# Supplementary material for: Slc7a14 Is Indispensable in Zebrafish Retinas
Source: PubMed Central journal article supplement (PMC6920099; doi:10.3389/fcell.2019.00333), 2019-12-12
Supplement: Table_1.pdf [file Table_1.pdf]

## Supplementary Material

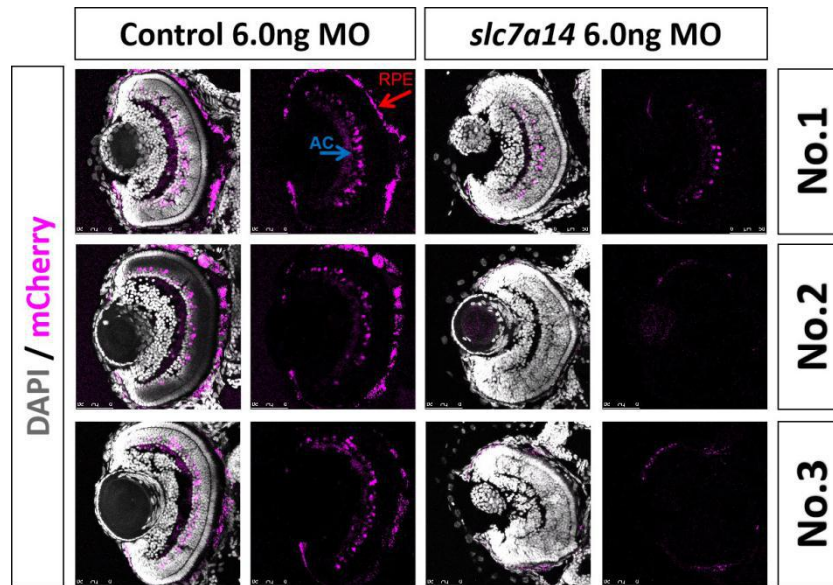

**Fig. S1 Knockdown of *slc7a14* in Tg(*gad1b*:mCherry) transgenic zebrafish.**

The mCherry fluorescent signals occurred specifically in amacrine cells (ACs) and RPE cells in Tg(*gad1b*:mCherry) larval retinas at 3 dpf. Injection of *slc7a14* MO at 6.0 ng led to dramatic declines in mCherry signals in both amacrine cells and RPE cells. Scale bars = 50  $\mu$ m.

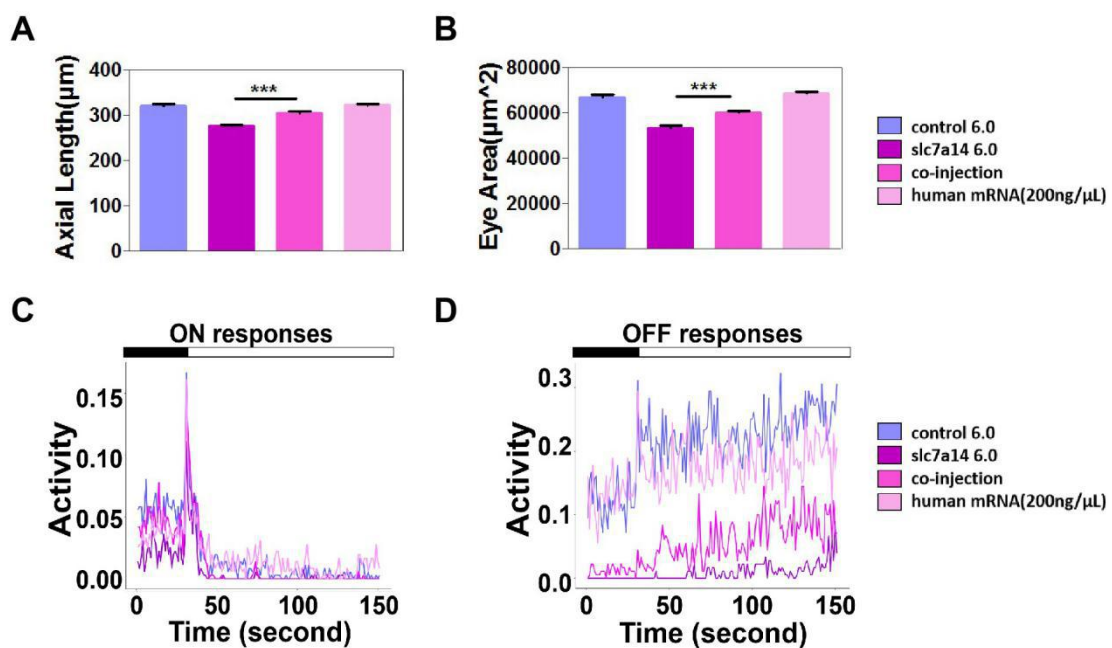

**Fig. S2 Eye size measurements and VMR responses in the rescue experiments using human *SLC7A14* mRNA.**

(A, B) Statistical results for the axial length and ocular area ( $N = 35$  in each group). Larvae injected with *slc7a14* MO and human full-length *SLC7A14* mRNA showed relatively normal sized eyeballs at 3 dpf. Bar plots were shown as the mean $\pm$ s.e.m. Data was analysed using One-way ANOVA followed by Tukey's post-hoc test, \*\*\* $P < 0.001$  significantly different from *slc7a14* 6.0 ng group. (C, D) VMR testing showed rescue effects of both the ON and OFF responses in *slc7a14*-deficient zebrafish when compensating with human mRNA.  $N = 12$  in each group. Rescue experiments were repeated three times. These results were consistent with the observations in the zebrafish *slc7a14* mRNA compensation experiments.

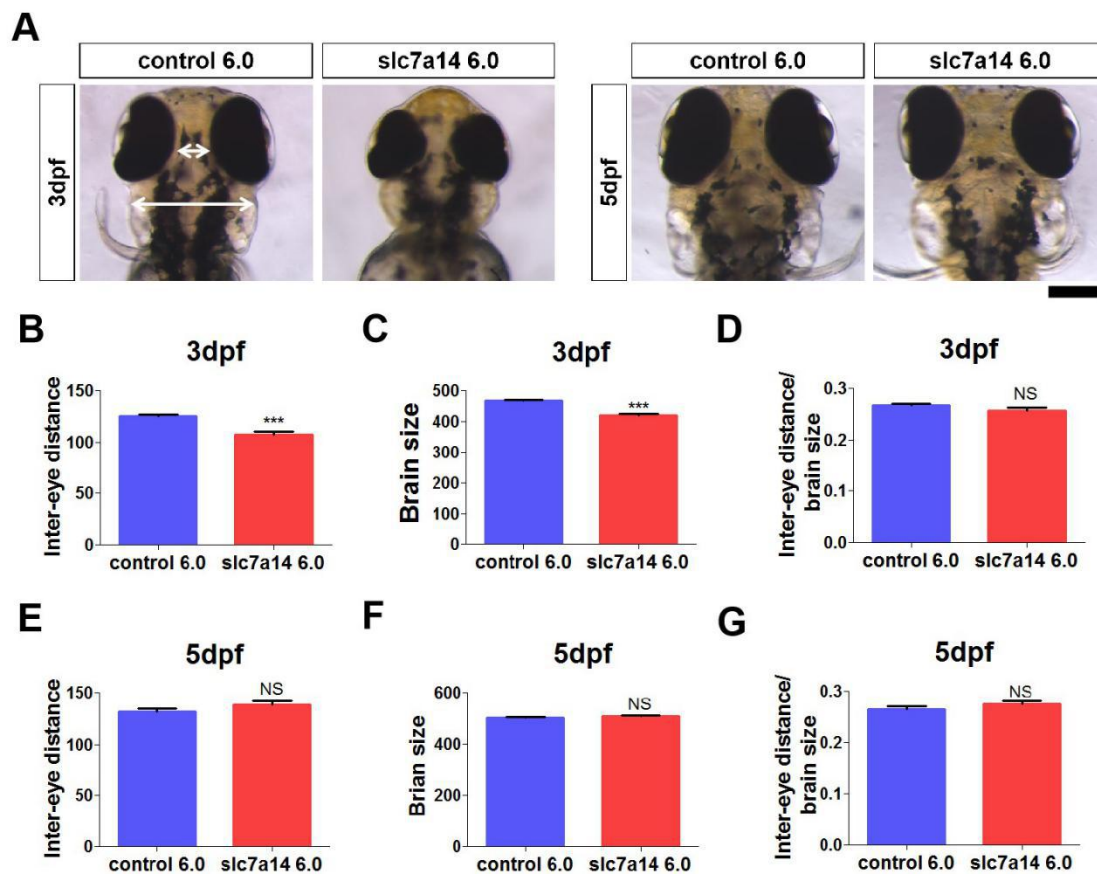

**Fig. S3 Measurements of the inter-eye distance and brain size in *slc7a14* knockdown larvae at 3dpf and 5dpf.**

(A) Vertical view of larvae injected with *slc7a14* MO and control MO at 3dpf and 5 dpf. The very left image showed the inter-eye distance (short double-arrow) and brain size (long double-arrow) we calculated. Scale bar = 200  $\mu$ m.

(B-G) Statistical results of larvae for the inter-eye distance, brain size and inter-eye distance/brain size ratio at 3 dpf (B-D) and 5 dpf (E-G).  $N = 19$  for each group. The experiments were repeated three times. Bar plots were shown as the mean $\pm$ s.e.m. T-test was performed between the two groups. \*\*\* $P < 0.001$ . NS: nonsignificant.

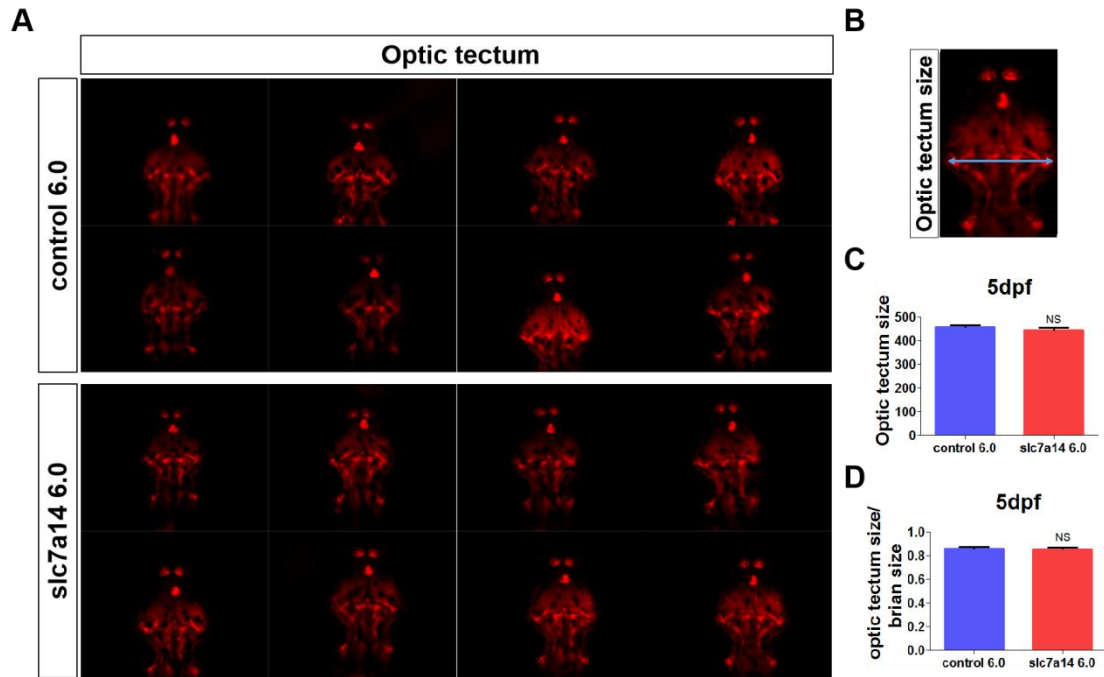

**Fig. S4 Knockdown of *slc7a14* had no significant changes in optic tectum**  
**(A)** Vertical view of the optic tectum in the Tg(gad1b:mCherry) transgenic larvae with the injections of *slc7a14* MO and control MO at 5 dpf. **(B)** Measurements of the size of optic tectum. **(C, D)** Statistical results for the optic tectum size and optic tectum size/brain size ratio at 5dpf.  $N = 8$  in each group. Bar plots were shown as the mean $\pm$ s.e.m. T-test was performed between two groups. NS: no significance.

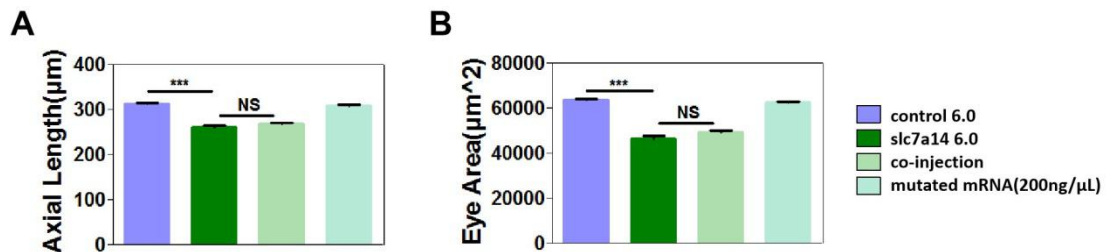

**Fig. S5 Mutated zebrafish *slc7a14* mRNA did not rescue the phenotype of the eye size in *slc7a14*-deficient morphants.**

**(A, B)** Statistical analyses of the axial length and the ocular area ( $N = 20$  in each group). Unlike the observation we got in figure 6, we could not observe a significant rescue effect using the mutated *slc7a14* zebrafish mRNA in *slc7a14*-deficient morphants at 3 dpf. The experiments were repeated three times. Data was analysed using One-way ANOVA followed by Tukey's post-hoc test, \*\*\* $P < 0.001$  significantly different from *slc7a14* 6.0 ng group. NS: not significantly different from *slc7a14* 6.0 ng group.
